# Supplementary material for: The diversity and abundance of chytrids on the Greenland Ice Sheet – new quantitative data
Source: Research Square preprint supplement (doi:10.21203/rs.3.rs-7636781/v1), 2025-09-24
Supplement: Supplementary file 1 [file 40e39d7a27629b1a21d1d8d4.docx]

The diversity and abundance of chytrids on the Greenland Ice Sheet – new quantitative data.

Authors: Laura Perini1, Athanasios Zervas1*, Louise Feld1, Carsten S. Jacobsen1, Liane G. Benning2,3, Martyn Tranter1, Alexandre M. Anesio1

1 Department of Environmental Science, Aarhus University, 4000 Roskilde, Denmark

2 GFZ, Helmholtz Centre for Geosciences, Telegrafenberg, 14473 Potsdam, Germany

3 Department of Earth Sciences, Freie Universität Berlin, 12249 Berlin, Germany

*Corresponding author: Athanasios Zervas ([az@envs.au.dk](mailto:az@envs.au.dk))


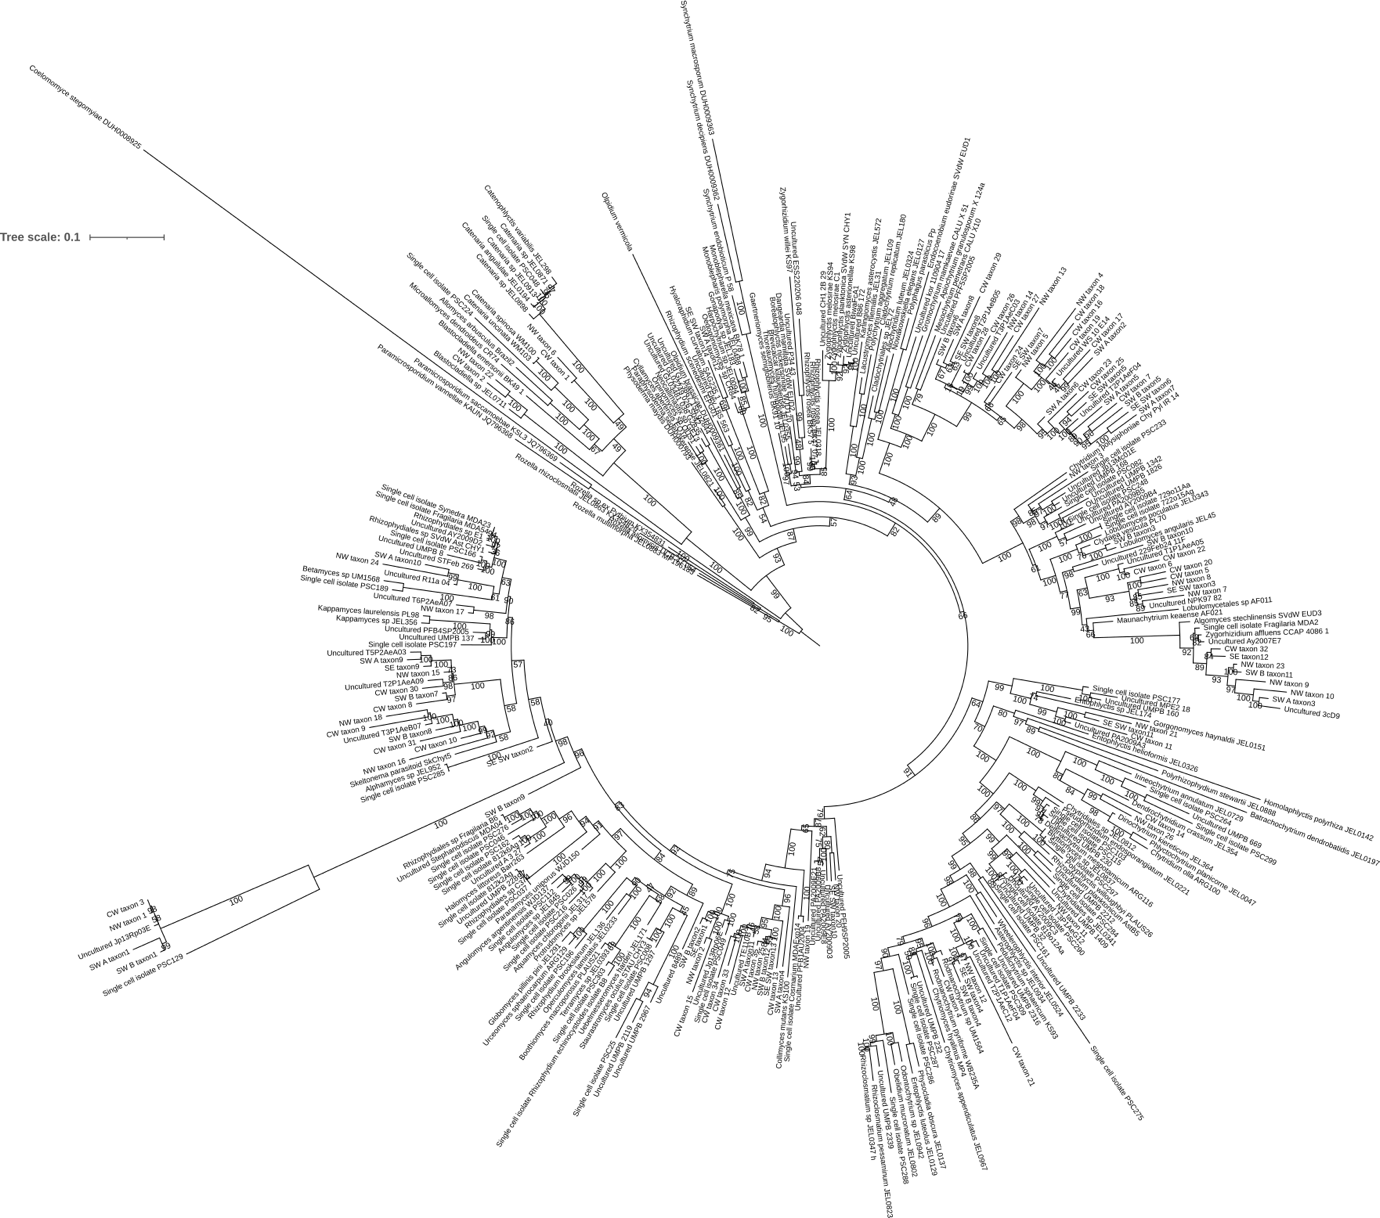


FigureS Maximum likelihood tree showing the phylogenetic position of chytrid species belonging to Blastocladiomycota, Monoblepharidomycota and Chytridiomycota phyla using the alignment of the 18S rRNA gene. The dataset of 18S rRNA sequences from 237 reference species and uncultured taxa published in Seto et al., 2023 was included. ML bootstrap values higher than 50% were shown on each branch.

Figure S2 Dynamics of Chytridiomyocta phylum and single orders over the 2022 melting season. Chytrids were quantified as relative abundance calculated against the whole microbial community for five samples of dark ice and cryoconite in 7 sampling days over a 21-day period. ICE stands for dark ice and CC stands for cryconite.


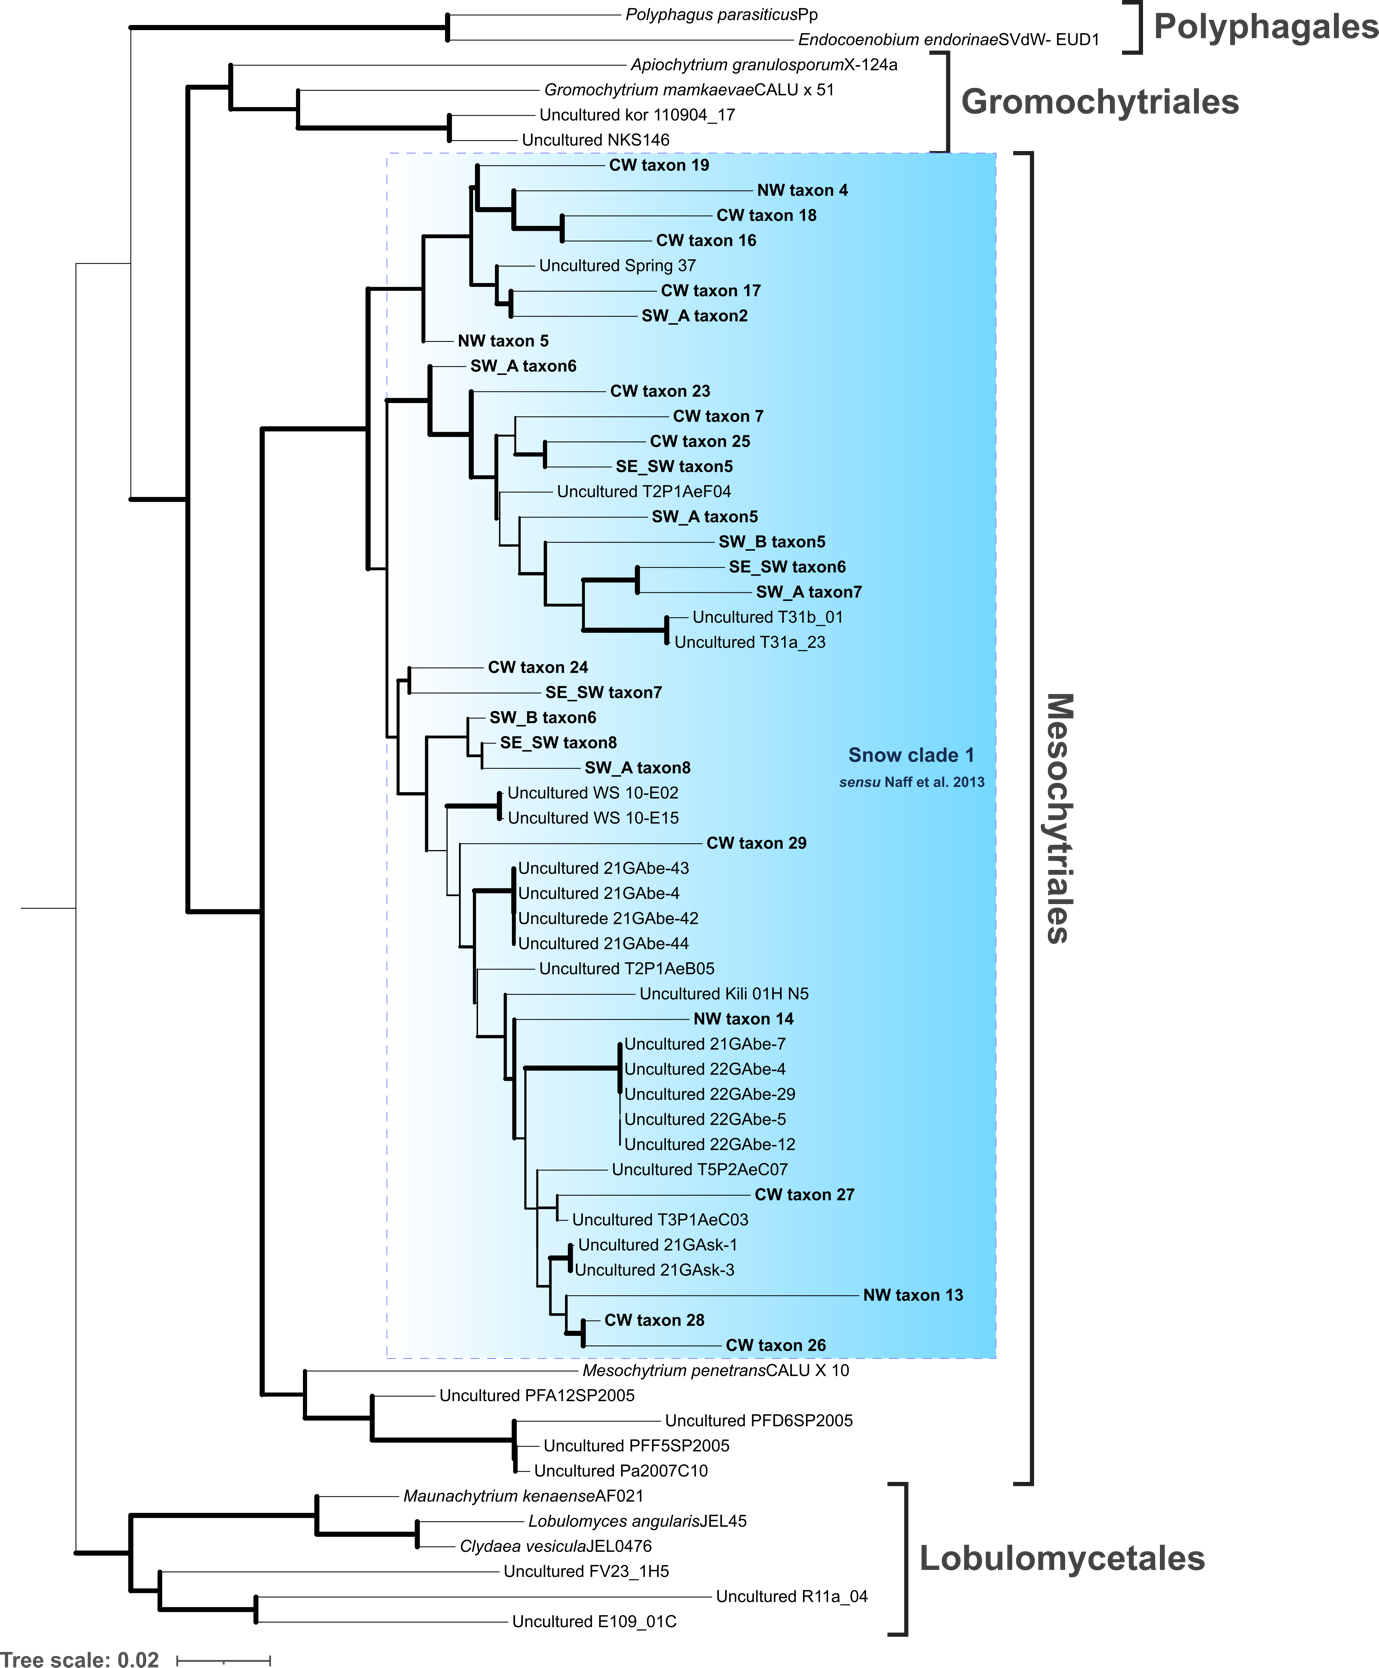


Figure S3 Maximum likelihood molecular phylogenetic tree showing the phylogenetic position of chytrid species belonging to Polyphagales, Gromochytriales, Mesochytriales, and Lobulomycetales using 18S rRNA. Lobulomycetales is the outgroup. Bold letters indicate samples detected in this study. Light blue shading indicates Snow Clade 1 proposed by Naff et al. (2013). Nodes supported by Boostrap ≥70% are highlighted with a bold line.
