# Supplementary material for: The diversity and abundance of chytrids on the Greenland Ice Sheet – new quantitative data
Source: Research Square preprint supplement (doi:10.21203/rs.3.rs-7636781/v1), 2025-09-24
Supplement: Supplementary file 2 [file 5903a7190fda555e85552d77.xlsx]

## Sheet: Manuscript details
The diversity and abundance of chytrids on the Greenland Ice Sheet – new quantitative data.
Authors: Laura Perini1, Athanasios Zervas1*, Louise Feld1, Carsten S. Jacobsen1, Liane G. Benning2,3, Martyn Tranter1, Alexandre M. Anesio1
1 Department of Environmental Science, Aarhus University, 4000 Roskilde, Denmark
2 GFZ, Helmholtz Centre for Geosciences, Telegrafenberg, 14473 Potsdam, Germany
3 Department of Earth Sciences, Freie Universität Berlin, 12249 Berlin, Germany
*Corresponding author: Athanasios Zervas (az@envs.au.dk)

## Sheet: TableS1 - Gr19-20
Year	Sample	Location	Glacier	Coordinates	Elevation m.a.s.l	Description	Assembly Type	mL filtered for RNA	Field sample names ( * also investigated in)
2019	MT11	East Greenland	Mittivakkat	65.6891 N 37.8638 E	274	Dark ice	Metatranscriptome		MIT-6
2019	MT12	East Greenland	Mittivakkat	65.6941 N 37.8338 E	451	Red Snow	Metatranscriptome	1050	MIT-1
2019	MT14	East Greenland	Mittivakkat	65.6938 N 37.8402 E	415	Dark ice	Metatranscriptome	250	MIT-3
2019	MT19	East Greenland	HeimGlacier	65.9930 N 38.4472 E	286	Dark ice	Metatranscriptome	120	HE2
2020	MT22	South-West Greenland	GreenlandIceSheet	61.1255 N 46.8288 E	619.7	Red Snow	Metatranscriptome	80	GR20-2
2020	MT26	South-West Greenland	GreenlandIceSheet	61.0998 N 46.833 E	619.7	Green Snow	Metatranscriptome	200	GR20-4
2020	MT27	South-West Greenland	GreenlandIceSheet	61.0998 N 46.833 E	619.7	Green Snow Biofilm	Metatranscriptome	125 (1/2)	GR20-5
2020	MT28	South-West Greenland	GreenlandIceSheet	61.0998 N 46.833 E	619.7	Red Snow	Metatranscriptome	350	GR20-6
2019	MT3	South-West Greenland	Mittivakkat	65.6944 N 37.8347 E	445	Red Snow	Metatranscriptome	500	MIT-2
2020	MT30	South-West Greenland	GreenlandIceSheet	61.0764 N 46.7922 E	619.7	Cryoconite	Metatranscriptome	250 (1/2 filt)	GR20-11
2020	MT31	South-West Greenland	GreenlandIceSheet	61.0764 N 46.7922 E	619.7	Dark ice	Metatranscriptome	500	GR20-12
2019	MT5	East Greenland	Mittivakkat	65.6926 N 37.8511 E	370	Dark ice	Metatranscriptome	250	MIT-4
2019	MT6	East Greenland	Mittivakkat	65.6905 N 37.8572 E	343	Dark ice	Metatranscriptome	40	MIT-5
2019	MT7	East Greenland	Brucknerglacier	65.9503 N 38.5188 E	942	Red Snow	Metatranscriptome	150	BR-1
2019	MT8	East Greenland	HeimGlacier	65.9930 N 38.4472 E	286	Dark ice	Metatranscriptome	85	HE1
* Samples studied in Halbach et al. 2022

## Sheet: TableS2 - Gr21
Sample	Location	Taxon	Glacier	Coordinates	Elevation m.a.s.l	Description	Assembly Type	mL filtered for DNA
Cryoconite_1	South-West Greenland	B	Greenland Ice Sheet	61.10138895N, −46.8481389E	619.7	Cryoconite	Metagenome	12
Cryoconite_2	South-West Greenland	B	Greenland Ice Sheet	61.10138895N, −46.8481389E	619.7	Cryoconite	Metagenome	12
Cryoconite_3	South-West Greenland	B	Greenland Ice Sheet	61.10138895N, −46.8481389E	619.7	Cryoconite	Metagenome	12
Ice_1	South-West Greenland	B	Greenland Ice Sheet	61.10138895N, −46.8481389E	619.7	Dark ice	Metagenome	500
Ice_2	South-West Greenland	B	Greenland Ice Sheet	61.10138895N, −46.8481389E	619.7	Dark ice	Metagenome	500
Ice_3	South-West Greenland	B	Greenland Ice Sheet	61.10138895N, −46.8481389E	619.7	Dark ice	Metagenome	500
Biofilm_1	South-West Greenland	B	Greenland Ice Sheet	61.10138895N, −46.8481389E	619.7	Biofilm	Metagenome	50
Biofilm_2	South-West Greenland	B	Greenland Ice Sheet	61.10138895N, −46.8481389E	619.7	Biofilm	Metagenome	50
Biofilm_3	South-West Greenland	B	Greenland Ice Sheet	61.10138895N, −46.8481389E	619.7	Biofilm	Metagenome	50
LP21	South-West Greenland	A	Greenland Ice Sheet	61.10138895N, −46.8481389E	619.7	Red snow	Metagenome	500
LP22	South-West Greenland	A	Greenland Ice Sheet	61.10138895N, −46.8481389E	619.7	Cryoconite	Metagenome	200
LP23	South-West Greenland	A	Greenland Ice Sheet	61.10138895N, −46.8481389E	619.7	Dark ice	Metagenome	500

## Sheet: TableS3 - Gr22
Sample	Location	Glacier	Coordinates	Elevation m.a.s.l	Description	Vol. filtered DNA	Assembly Type
cc1	Central West Greenland	Greenland Ice Sheet	N 69° 26.0054' E -49° 51.5985	683.409	cryoconite sediment	0.5 g	Metagenome/Metatranscriptome
cc2	Central West Greenland	Greenland Ice Sheet	N 69° 26.0045' E -49° 51.6002	683.343	cryoconite sediment	0.5 g	Metagenome/Metatranscriptome
cc3	Central West Greenland	Greenland Ice Sheet	N 69° 26.0068' E -49° 51.5826	684.047	cryoconite sediment	0.5 g	Metagenome/Metatranscriptome
cc4	Central West Greenland	Greenland Ice Sheet	N 69° 26.0076' E -49° 51.5805	684.293	cryoconite sediment	0.5 g	Metagenome/Metatranscriptome
cc5	Central West Greenland	Greenland Ice Sheet	N 69° 26.0082' E -49° 51.5679	684.508	cryoconite sediment	0.5 g	Metagenome/Metatranscriptome
ice1	Central West Greenland	Greenland Ice Sheet	N 69° 25.9973' E -49° 51.5640	683.527	dark ice	600 ml	Metagenome/Metatranscriptome
ice2	Central West Greenland	Greenland Ice Sheet	N 69° 25.9419' E -49° 51.5997	678.469	dark ice	600 ml	Metagenome/Metatranscriptome
ice3	Central West Greenland	Greenland Ice Sheet	N 69° 25.9310' E -49° 51.5438	679.388	dark ice	600 ml	Metagenome/Metatranscriptome
ice4	Central West Greenland	Greenland Ice Sheet	N 69° 25.9340' E -49° 51.5178	679.948	dark ice	600 ml	Metagenome/Metatranscriptome
ice5	Central West Greenland	Greenland Ice Sheet	N 69° 25.9312' E -49° 51.6646	675.929	dark ice	600 ml	Metagenome/Metatranscriptome

## Sheet: TableS4 - Gr23
Sample	Location	Glacier	Coordinates	Elevation m.a.s.l	Description	Vol. filtered DNA/RNA[mL]	Assembly Type
Gr23_2	North West Greenland	Qaanaaq glacier	N 77° 29.7761' W 069° 12.5106'	-	Green snow	200/200	Metagenome/Metatranscriptome
Gr23_3	North West Greenland	Qaanaaq glacier	N 77° 29.7761' W 069° 12.5106'	-	Red snow	300/300	Metagenome/Metatranscriptome
Gr23_4	North West Greenland	Qaanaaq glacier	N 77° 29.8606' W 069° 12.8812'	-	Dark Ice	250/200	Metagenome/Metatranscriptome
Gr23_5	North West Greenland	Qaanaaq glacier	N 77° 29.8738' W 069° 12.8950'	-	Dark Ice	200/200	Metagenome/Metatranscriptome
Gr23_12_A	North West Greenland	Qaanaaq glacier small transect	N 77° 30.1256' W 069° 10.1120'	505	Dark Ice	17	Metagenome
Gr23_12_B	North West Greenland	Qaanaaq glacier small transect	N 77° 30.1256' W 069° 10.1120'	505	Dark Ice	16	Metagenome
Gr23_12_C	North West Greenland	Qaanaaq glacier small transect	N 77° 30.1256' W 069° 10.1120'	505	Dark Ice	19	Metagenome
Gr23_12_D	North West Greenland	Qaanaaq glacier small transect	N 77° 30.1256' W 069° 10.1120'	505	Dark Ice	20	Metagenome
Gr23_12_E	North West Greenland	Qaanaaq glacier small transect	N 77° 30.1256' W 069° 10.1120'	505	Dark Ice	16	Metagenome
Gr23_12_F	North West Greenland	Qaanaaq glacier small transect	N 77° 30.1256' W 069° 10.1120'	505	Dark Ice	22	Metagenome
Gr23_14_A	North West Greenland	Qaanaaq glacier small transect	N 77° 30.1371' W 069° 10.0390'	511	Dark Ice	24	Metagenome
Gr23_14_B	North West Greenland	Qaanaaq glacier small transect	N 77° 30.1371' W 069° 10.0390'	511	Dark Ice	17	Metagenome
Gr23_14_C	North West Greenland	Qaanaaq glacier small transect	N 77° 30.1371' W 069° 10.0390'	511	Dark Ice	20	Metagenome
Gr23_14_D	North West Greenland	Qaanaaq glacier small transect	N 77° 30.1371' W 069° 10.0390'	511	Dark Ice	17	Metagenome
Gr23_14_E	North West Greenland	Qaanaaq glacier small transect	N 77° 30.1371' W 069° 10.0390'	511	Dark Ice	20	Metagenome
Gr23_14_F	North West Greenland	Qaanaaq glacier small transect	N 77° 30.1371' W 069° 10.0390'	511	Dark Ice	28	Metagenome
Gr23_18	North West Greenland	Qaanaaq glacier	N77° 30.150' W69° 10.011'	608	Dark Ice	150/150	Metagenome/Metatranscriptome
Gr23_19	North West Greenland	Qaanaaq glacier	N77° 30.157' W69° 10.195'	608	Dark Ice	150/150	Metagenome/Metatranscriptome
Gr23_35	North West Greenland	Qaanaaq glacier	N77° 30.164' W69° 10.039'	610	Dark Ice	150/150	Metagenome/Metatranscriptome
Gr23_42	North West Greenland	Greenland Ice Sheet	N77° 48.247' W68° 21.140'	-	Dark Ice	250/250	Metagenome/Metatranscriptome
Gr23_45	North West Greenland	Greenland Ice Sheet	N77° 48.244' W68° 21.099'	-	Dark ice	250/250	Metagenome/Metatranscriptome

## Sheet: Table S5 - ID ref seq
List of taxa and environmental sequences used for the phylogenetic analysis of the concatentad dataset (18S, 5.8S, 28S rDNA)				Accession numbers
Affiliation	Genera	Species	Strain / Sequence ID	18S rDNA	ITS (5.8S)	28S rDNA
Chytridiomycota / Rhizophydiales / Family incertae sedis		Uncultured	T6P2AeA07	GQ995432	-	-
Chytridiomycota / Rhizophydiales / Alphamycetaceae&Kappamycetaceae		Uncultured	PFB4SP2005	EU162636	-	-
Chytridiomycota / Rhizophydiales / Family incertae sedis		Uncultured	Jp13Rp03E	AB971109	-	-
Chytridiomycota / Rhizophydiales / Alphamycetaceae&Kappamycetaceae	Kappamyces	laurelensis	PL98	DQ536478	DQ536494	DQ273824
Chytridiomycota / Rhizophydiales / Family incertae sedis		Uncultured	R11a_04	KC561955	-	-
Chytridiomycota / Rhizophydiales / Family incertae sedis		Uncultured	T3P1AeB07	GQ995433	-	-
Chytridiomycota / Rhizophydiales / Family incertae sedis		Uncultured	T5P2AeA03	GQ995423	-	-
Chytridiomycota / Rhizophydiales / Family incertae sedis		Uncultured	T2P1AeA09	GQ995427	-	-
Chytridiomycota / Rhizophydiales / Family incertae sedis		Uncultured	Jp13Rp06E	AB971114	-	-
Chytridiomycota / Rhizophydiales / Family incertae sedis		Uncultured	TE110B	KM870671	-	-
Chytridiomycota / Rhizophydiales / Family incertae sedis		Uncultured	8489	GU568165	-	-
Chytridiomycota / Rhizophydiales / Terramycetaceae	Boothiomyces	macroporosus	PLAUS21	DQ322622	AY997084	DQ273823
Chytridiomycota / Rhizophydiales / Rhizophydiaceae	Rhizophydium	brooksianum	JEL136	AY601710	AY997079	DQ273770
Chytridiomycota / Rhizophydiales / Uebelmesseromycetaceae	Uebelmesseromyces	harderi	JEL171	AF164272	AY997077	DQ273775
Chytridiomycota / Rhizophydiales / Novel Clade II (Lefèvre et al. 2008)		Uncultured	AY2009D3	HQ219449	HQ219449	-
Chytridiomycota / Rhizophydiales / Novel Clade II (Lefèvre et al. 2008)		Uncultured	PA2009E21	HQ191292	HQ191292	-
Chytridiomycota / Rhizophydiales / Novel Clade II (Lefèvre et al. 2008)		Uncultured	PA2009E8	HQ191289	HQ191289	-
Chytridiomycota / Spizellomycetales	Gaertneriomyces	semiglobiferus	UCB-91-10	AF164247	AY997051	DQ273778
Chytridiomycota / Spizellomycetales	Brevicalcar	kilaueaense	JEL0355	DQ536477	AY997093	DQ273821
Chytridiomycota / Spizellomycetales	Thoreauomyces	humboldtii	JEL0095	AF164245	AY997075	DQ273776
Chytridiomycota / Rhizophlyctidales	Rhizophlyctis	rosea	BK57-5	AH009027	-	-
Chytridiomycota / Rhizophlyctidales	Rhizophlyctis	rosea	JEL0318	AY635829	AY997078	DQ273787
Chytridiomycota / Rhizophlyctidales	Rhizophlyctis	rosea	BK47-7	AH009028	-	-
Chytridiomycota / Dangeardia clade	Dangeardia	mamillata	SVdW-EUD2	MG605054	-	MG605051
Chytridiomycota / Dangeardia clade		Uncultured	P34.43	AY642701	-	-
Chytridiomycota / Zygophlyctidales		Uncultured	CH1_2B_29	AY821989	-	-
Chytridiomycota / Zygophlyctidales	Zygophlyctis	melosirae	KS94	LC176288	LC176298	LC176293
Chytridiomycota / Zygophlyctidales	Zygophlyctis	melosirae	C1	LC176287	LC176297	LC176292
Chytridiomycota / Zygophlyctidales	Zygophlyctis	planktonica	SVdW-SYN-CHY1	LC482219	LC482220	LC482221
Chytridiomycota / Zygophlyctidales	Zygophlyctis	asterionellae	KS98	LC176289	LC176299	LC176294
Chytridiomycota / Zygophlyctidales		Uncultured	B86-172	EF196796	-	-
Chytridiomycota / Zygophlyctidales		Single cell isolate	BiwaFcA1	AB971229	-	-
Chytridiomycota / Order incertae sedis / Family incertae sedis		Uncultured	PA2009A3	HQ191313	-	-
Chytridiomycota / Chytridiales / Chytridiaceae	Dendrochytridium	crassum	JEL0354	AY635827	AY997083	DQ273785
Chytridiomycota / Chytridiales / Chytridiaceae	Dinochytrium	kinnereticum	JEL364	KT362375	-	KT281910
Chytridiomycota / Chytridiales / Chytriomycetaceae	Rhizoclosmatium	sp.	JEL0347-h	AY601709	AY997076	DQ273769
Chytridiomycota / Chytridiales / Chytriomycetaceae	Chytriomyces	hyalinus	MP4	DQ536487	DQ536499	DQ273836
Chytridiomycota / Chytridiales / Chytriomycetaceae	Rodmanochytrium	pyriforme	WB235A	DQ536486	DQ536493	DQ536498
Chytridiomycota / Chytridiales / Family incertae sedis		Uncultured	T2P1AeC12	GQ995264	-	-
Chytridiomycota / Polychytriales	Karlingiomyces	asterocystis	JEL0572	HQ901769	-	HQ901708
Chytridiomycota / Polychytriales	Polychytrium	aggregatum	JEL0109	AY601711	AY997074	AY546686
Chytridiomycota / Polychytriales	Lacustromyces	hiemalis	JEL0938	MT730902	MT730902	MT730902
Chytridiomycota / Cladochytriales	Cladochytrium	replicatum	JEL0180	AY546683	AY997037	AY546688
Chytridiomycota / Cladochytriales	Nowakowskiella	elegans	JEL0127	AY635835	AY997065	DQ273798
Chytridiomycota / Cladochytriales	Allochytridium	luteum	JEL0324	AY635844	AY997044	DQ273816
Chytridiomycota / Cladochytriales	Cladochytriales	sp.	JEL0072	MT730663	MT730663	MT730663
Chytridiomycota / Synchytriales	Synchytrium	endobioticum	P-58	AJ784274	-	-
Chytridiomycota / Synchytriales	Synchytrium	decipiens	DUH0009362	DQ536475	AY997094	DQ273819
Chytridiomycota / Synchytriales	Synchytrium	macrosporum	DUH0009363	DQ322623	AY997095	DQ273820
NC_ChyL-1	Rhizophydium	scenedesmi	EPG01	MF163176	-	-
NC_ChyL-1		Uncultured	Elev_18S_563	EF024210	-	-
Chytridiomycota / Lobulomycetales / Family incertae sedis		Uncultured	11F	JN705531	-	-
Chytridiomycota / Lobulomycetales / Family incertae sedis		Uncultured	NPK97-82	EU371354	-	-
Chytridiomycota / Lobulomycetales / Family incertae sedis		Uncultured	3cD9	FN690491	-	-
Chytridiomycota / Lobulomycetales / Family incertae sedis		Uncultured	T1P1AeA05	GQ995410	-	-
Chytridiomycota / Lobulomycetales / Family incertae sedis		Uncultured	Ay2007E7	JQ689413	-	-
Chytridiomycota / Lobulomycetales	Clydaea	vesicula	PL70	EF443138	EU352774	EF443143
Chytridiomycota / Lobulomycetales	Lobulomyces	angularis	JEL0045	AF164253	AY997036	DQ273815
Chytridiomycota / Lobulomycetales	Maunachytrium	keaense	AF021	EF432822	EF432822	EF432822
Chytridiomycota / Gromochytriales	Gromochytrium	mamkaevae	CALU_X-51	KF586842	KF586842	KF586842
Chytridiomycota / Gromochytriales		Uncultured	kor_110904_17	FJ157331	-	-
Chytridiomycota / Mesochytriales	Mesochytrium	penetrans	CALU_X-10	FJ804149	-	FJ804153
Chytridiomycota / Mesochytriales		Uncultured	PFF5SP2005	EU162641	-	-
Chytridiomycota / Mesochytriales		Uncultured	T2P1AeB05	GQ995415	-	-
Chytridiomycota / Mesochytriales		Uncultured	T3P1AeC03	GQ995413	-	-
Chytridiomycota / Mesochytriales		Uncultured	WS-10-E14	AJ867630	-	-
Chytridiomycota / Mesochytriales		Uncultured	T2P1AeF04	GQ995412	-	-
Monoblepharidomycota	Monoblepharella	mexicana	BK78-1	AF164337	AY997061	DQ273777
Monoblepharidomycota	Hyaloraphidium	curvatum	SAG235-1	Y17504	AY997055	DQ273771
Monoblepharidomycota	Gonapodya	sp.	JEL0183	AH009066	AY349112	KJ668088
Neocallimastigomycota	Cyllamyces	aberensis	EO14	DQ536481	AY997042	DQ273829
Neocallimastigomycota	Neocallimastix	sp.	GE13	DQ322625	AY997064	DQ273822
Neocallimastigomycota	Orpinomyces	sp.	OUS1	AJ864616	AJ864475	AJ864475
Blastocladiomycota	Catenophlyctis	variabilis	JEL0298	AY635822	AY997034	DQ273780
Blastocladiomycota	Blastocladiella	emersonii	BK49-1	AY635842	AY997032	DQ273808
Blastocladiomycota	Allomyces	arbusculus	Brazil2	AY552524	AY997028	AY552525
Rozellomycota	Rozella	allomycis	UCB 47-054	AY635838	AY997087	DQ273803	Outgroup

## Sheet: Table S6 - Pos and neg controls
Taxonomy	Species	qPCR amplification results
Ascomycota; Sordariomycetes	Fusarium culmozum	+ (Ct=38.13)
Ascomycota; Sordariomycetes	Fusarium culmozum	- (N/A)
Basidiomycota; Microbotryomycetes	Camptobasidium sp. strain LF 3.1	- (N/A)
Basidiomycota; Microbotryomycetes	Camptobasidium sp. strain FB2	- (N/A)
Basidiomycota; Microbotryomycetes	Camptobasidium sp. strain LD92	- (N/A)
Tracheophyta; Triticea	Triticum aestivum	+ (Ct=37.19)
Tracheophyta; Triticea	Triticum aestivum	+ (Ct=35.75)
Ochrophyta; Xanthophyceae	Heterococcus sp.	+ (Ct=39.70)
Streptophyta; Zygnematales	Ancylonema sp.strain C4	- (N/A)
Chlorophyta; Trebouxiophyceae	Deuterostichococcus cf. epilithicus GUPI-18	- (N/A
Chytridiomycota; Rhizophlyctidales	Rhizophlyctis rosea strain CBS 576.84	+ (Ct=11.25)
Chytridiomycota; Rhizophydiales	Boothiomyces macroporosum strain CBS 122107	+ (Ct=7.51)
negC (MQ)	-	- (N/A)
negC (MQ)	-	- (N/A)
Determination of amplification for positive and negative controls.
Note: The two replicates of F. culmozum and T. aestivum represent two individual DNA extractions from the same strain. Standard: B. macroporosum 309 bp PCR product (15.2 ng/ul) corresponds to 4.55 × 1010 copies/ul. MQ stands for MilliQ water.

## Sheet: Table S7 - Rel_abundance_GR22
Samplename	0728ICE1	0728ICE2	0728ICE3	0728ICE4	0728ICE5	0801ICE1	0801ICE2	0801ICE3	0801ICE4	0801ICE5	0805ICE1	0805ICE2	0805ICE3	0805ICE4	0805ICE5	0807ICE1	0807ICE2	0807ICE3	0807ICE4	0807ICE5	0809ICE1	0809ICE2	0809ICE3	0809ICE4	0809ICE5	0813ICE1	0813ICE2	0813ICE3	0813ICE4	0813ICE5	0818ICE1	0818ICE2	0818ICE3	0818ICE4	0818ICE5
Date	day1	day1	day1	day1	day1	day2	day2	day2	day2	day2	day3	day3	day3	day3	day3	day4	day4	day4	day4	day4	day5	day5	day5	day5	day5	day6	day6	day6	day6	day6	day7	day7	day7	day7	day7
Replicate	ICE1	ICE2	ICE3	ICE4	ICE5	ICE1	ICE2	ICE3	ICE4	ICE5	ICE1	ICE2	ICE3	ICE4	ICE5	ICE1	ICE2	ICE3	ICE4	ICE5	ICE1	ICE2	ICE3	ICE4	ICE5	ICE1	ICE2	ICE3	ICE4	ICE5	ICE1	ICE2	ICE3	ICE4	ICE5	Kingdom	Phylum	Class	Order	Family	Genus	Species
GQ995264.1.1766	0.474498	0.554913	0.368889	0.273196	0.184053	0.812875	0.670992	0.675714	0.245713	0.526825	0.949222	0.301098	0.771848	0.482211	0.740411	0.774329	0.230921	0.586089	0.18317	0.210657	0.656357	0.310731	0.642031	0.552708	0.345151	0.70814	0.239467	0.773265	0.180111	0.357875	0.720166	0.51062	0.658537	0.305502	0.532182	Amorphea	Chytridiomycota	Chytridiomycetes	Chytridiales	Chytriomycetaceae
AJ867630.1.1746	0.003567	0.0158598	0.00483009	0.0707138	0.0393611	0.00853329	0.0109509	0.00370641	0.104584	0.0623467	0.00929587	0.2442	0.015289	0.0343641	0.0470647	0.00849769	0.0788071	0.00544159	0.191406	0.0759768	0.00978018	0.170584	0.0156865	0.0377426	0.0652583	0.0095352	0.0748809	0.0107871	0.126487	0.125482	0.00945669	0.0591436	0.0133464	0.098596	0.126834	Amorphea	Chytridiomycota	Chytridiomycetes	Gromochytriales	Gromochytriaceae
AJ867630.1.1746_2	0.0213727	0.0432431	0.0180182	0.0955798	0.0592336	0.028513	0.0344091	0.0205996	0.148468	0.0876383	0.0371332	0.184082	0.0252778	0.0440297	0.0669926	0.0274005	0.0668517	0.0215968	0.319252	0.0769722	0.0393377	0.124432	0.0509334	0.0399323	0.0518611	0.0515078	0.0701189	0.0512949	0.189048	0.182038	0.0374369	0.0731844	0.0554784	0.165948	0.195798	Amorphea	Chytridiomycota	Chytridiomycetes	Gromochytriales	Gromochytriaceae
AJ867630.1.1746_2_dd0	0.334611	0.37589	0.26614	0.204388	0.131731	0.40204	0.355862	0.364022	0.121272	0.266271	0.341259	0.210289	0.272732	0.200975	0.269195	0.366758	0.133355	0.306271	0.116274	0.119883	0.337796	0.188472	0.369526	0.266428	0.22638	0.324639	0.130507	0.33754	0.130365	0.20094	0.365736	0.361171	0.42126	0.179004	0.236777	Amorphea	Chytridiomycota	Chytridiomycetes	Gromochytriales	Gromochytriaceae
AJ867630.1.1746_2_dd0_dd0	0.0241942	0.0268526	0.0201077	0.0509214	0.0344511	0.0236761	0.0189139	0.018116	0.072729	0.0467687	0.0256893	0.114008	0.022172	0.0278941	0.0379243	0.0277917	0.0496676	0.0191149	0.151443	0.0480211	0.0268761	0.0854625	0.0342744	0.034385	0.0299785	0.0348101	0.0388691	0.038906	0.104894	0.083098	0.0274027	0.0503151	0.0365508	0.10056	0.101184	Amorphea	Chytridiomycota	Chytridiomycetes	Gromochytriales	Gromochytriaceae
GQ995412.1.1770	0.220087	0.279822	0.168675	0.185756	0.131766	0.288112	0.303901	0.321512	0.150446	0.292307	0.290031	0.145132	0.257383	0.209571	0.289313	0.303105	0.109986	0.257805	0.25032	0.1277	0.279549	0.169136	0.318704	0.246508	0.120422	0.26812	0.124599	0.284744	0.214414	0.229202	0.261842	0.267337	0.333356	0.249138	0.287887	Amorphea	Chytridiomycota	Chytridiomycetes	Gromochytriales	Gromochytriaceae
GQ995412.1.1770_2	0.0072948	0.0216519	0.00788864	0.0628599	0.0377787	0.0112403	0.0164402	0.00618996	0.091342	0.0599335	0.0135167	0.217746	0.0220042	0.0475178	0.0484358	0.00961034	0.0930218	0.00622777	0.169228	0.080019	0.0134226	0.194832	0.0260964	0.0567466	0.104137	0.0157544	0.085661	0.0180827	0.129905	0.127433	0.0134992	0.0703787	0.0274814	0.12361	0.10749	Amorphea	Chytridiomycota	Chytridiomycetes	Gromochytriales	Gromochytriaceae
GQ995412.1.1770_2_dd0	0.0302756	0.0449261	0.0262248	0.0360735	0.029483	0.0440268	0.0352568	0.0257305	0.0409912	0.0384045	0.0486903	0.0631046	0.0247862	0.0355005	0.0353028	0.0285743	0.0305468	0.0172959	0.0831678	0.0281984	0.0382217	0.0468198	0.0621084	0.0316114	0.0175298	0.0426063	0.0258667	0.0427478	0.0506002	0.0378861	0.0422736	0.0487189	0.0646995	0.0838914	0.0454896	Amorphea	Chytridiomycota	Chytridiomycetes	Gromochytriales	Gromochytriaceae
GQ995413.1.1770_2	0.100972	0.139251	0.081521	0.114656	0.0894961	0.237627	0.143709	0.149328	0.10468	0.171704	0.171672	0.256449	0.123175	0.0985913	0.155707	0.189651	0.114015	0.140464	0.121926	0.0955324	0.147183	0.184326	0.161632	0.134886	0.110489	0.126036	0.0974625	0.128131	0.092881	0.116684	0.195818	0.187182	0.169923	0.148075	0.162382	Amorphea	Chytridiomycota	Chytridiomycetes	Gromochytriales	Gromochytriaceae
GQ995413.1.1770_2_dd0	0.33233	0.362775	0.262263	0.219909	0.132813	0.309905	0.327192	0.330375	0.125866	0.229847	0.285258	0.211051	0.241146	0.175443	0.226588	0.305306	0.130489	0.269474	0.140716	0.11419	0.304627	0.192518	0.336352	0.245645	0.213186	0.318081	0.131528	0.334887	0.167204	0.209324	0.306743	0.339337	0.384102	0.16728	0.232426	Amorphea	Chytridiomycota	Chytridiomycetes	Gromochytriales	Gromochytriaceae
GQ995413.1.1770_2_dd0_dd0	0.00726556	0.0393464	0.0111138	0.175351	0.125204	0.0176437	0.0169405	0.00858525	0.16472	0.135601	0.0179762	0.58063	0.0239108	0.0540778	0.0882744	0.0160295	0.168524	0.0108369	0.201009	0.130067	0.0171889	0.348082	0.0371439	0.0633422	0.125867	0.0196452	0.174096	0.0215741	0.17994	0.195136	0.0175707	0.155522	0.0359594	0.142815	0.177579	Amorphea	Chytridiomycota	Chytridiomycetes	Gromochytriales	Gromochytriaceae
GQ995413.1.1770_m25	0.016417	0.0349948	0.0234085	0.0535585	0.0475986	0.122036	0.0200812	0.0389299	0.0618377	0.114694	0.0944411	0.131997	0.0515269	0.0394388	0.0754001	0.0808198	0.0911239	0.0184829	0.123225	0.0511529	0.0422826	0.222046	0.184077	0.113613	0.0540037	0.0559438	0.0972693	0.0449002	0.0878078	0.1274	0.0915494	0.22201	0.188608	0.125831	0.121359	Amorphea	Chytridiomycota	Chytridiomycetes	Gromochytriales	Gromochytriaceae
JQ689413.1.1659	0.00274834	0.00365413	0.00246804	0.00233611	0.00115186	0.010938	0.00279331	0.00335342	0.00169112	0.00248245	0.00729852	0.00270517	0.00350148	0.00231794	0.00250069	0.0125081	0.00246595	0.00934166	0.00353564	0.00180868	0.016197	0.00264053	0.0139329	0.0238744	0.00525894	0.00717719	0.00183579	0.00805902	0.00282573	0.00742507	0.0129217	0.00715758	0.0146962	0.00718869	0.00484677	Amorphea	Chytridiomycota	Chytridiomycetes	Lobulomycetales	Lobulomycetaceae
AB971114.1.1357	0.390177	0.41228	0.304568	0.200619	0.120817	0.340026	0.378028	0.381495	0.0996487	0.230496	0.376433	0.107644	0.298717	0.219811	0.270411	0.359483	0.10632	0.302648	0.0806098	0.0918179	0.374716	0.123268	0.394937	0.287236	0.208334	0.377812	0.116662	0.38896	0.11387	0.185726	0.353897	0.331119	0.438034	0.142885	0.204411	Amorphea	Chytridiomycota	Chytridiomycetes	Rhizophydiales
KM870671.1.1737	0.00678314	0.0470337	0.0145811	0.0175996	0.0169521	0.0304093	0.0329082	0.0621895	0.00906188	0.0698287	0.0225237	0.0834552	0.0406867	0.0114884	0.0502294	0.0218739	0.0392615	0.027285	0.00669628	0.027458	0.0153135	0.0707408	0.118414	0.087429	0.0113817	0.0159018	0.0369505	0.0993111	0.00864804	0.0458569	0.0245729	0.115594	0.115628	0.0253883	0.047548	Amorphea	Chytridiomycota	Chytridiomycetes	Rhizophydiales
KM870671.1.1737_2_dd0	0.308326	0.350205	0.238098	0.164359	0.102492	0.318342	0.322481	0.338632	0.0766537	0.223507	0.284466	0.102941	0.240967	0.162785	0.221708	0.301589	0.0934737	0.265621	0.071302	0.0854936	0.294227	0.112762	0.348228	0.24607	0.17169	0.289328	0.0953921	0.338541	0.0955096	0.162955	0.304895	0.315744	0.391898	0.134598	0.190893	Amorphea	Chytridiomycota	Chytridiomycetes	Rhizophydiales
KM870671.1.1737_2_dd0_dd0	0.0180104	0.206875	0.0421384	0.0639778	0.0619678	0.0640752	0.156912	0.281233	0.0344607	0.302902	0.0445951	0.385885	0.159209	0.0338802	0.20892	0.0494089	0.142509	0.11563	0.022687	0.114202	0.0497069	0.239579	0.383411	0.327792	0.0302495	0.0374334	0.129913	0.452294	0.0285858	0.18604	0.0583138	0.349911	0.357334	0.084733	0.181447	Amorphea	Chytridiomycota	Chytridiomycetes	Rhizophydiales
GQ995427.1.1772	0.00836198	0.025958	0.0117345	0.0223292	0.0194769	0.029736	0.0193447	0.0330803	0.00888106	0.0454713	0.0263676	0.0341991	0.0263091	0.0122311	0.0347682	0.0273271	0.0208379	0.0175888	0.00851767	0.0150885	0.0215133	0.0368681	0.0659982	0.0490229	0.00843463	0.0182451	0.0249971	0.0550741	0.00795147	0.03739	0.0247318	0.0573105	0.0732078	0.0241142	0.0383946	Amorphea	Chytridiomycota	Chytridiomycetes	Rhizophydiales	Rhizophydiaceae
Sample	0728CC1	0728CC2	0728CC3	0728CC4	0728CC5	0801CC1	0801CC2	0801CC3	0801CC4	0801CC5	0805CC1	0805CC2	0805CC3	0805CC4	0805CC5	0807CC1	0807CC2	0807CC3	0807CC4	0807CC5	0810CC1	0810CC2	0810CC3	0810CC4	0810CC5	0813CC1	0813CC2	0813CC3	0813CC4	0813CC5	0818CC1	0818CC2	0818CC3	0818CC4	0818CC5
Date	day1	day1	day1	day1	day1	day2	day2	day2	day2	day2	day3	day3	day3	day3	day3	day4	day4	day4	day4	day4	day5	day5	day5	day5	day5	day6	day6	day6	day6	day6	day7	day7	day7	day7	day7
Replicate	CC1	CC2	CC3	CC4	CC5	CC1	CC2	CC3	CC4	CC5	CC1	CC2	CC3	CC4	CC5	CC1	CC2	CC3	CC4	CC5	CC1	CC2	CC3	CC4	CC5	CC1	CC2	CC3	CC4	CC5	CC1	CC2	CC3	CC4	CC5	Kingdom	Phylum	Class	Order	Family	Genus	Species
HQ888698.1.1717	0.0823933	0.079525	0.158439	0.0954057	0.0560237	0.100124	0.0357423	0.0560202	0.178954	0.0192876	0.0710753	0.0971125	0.0813612	0.101825	0.0245966	0.0762762	0.0932414	0.0676238	0.0439771	0.0387838	0.081652	0.109923	0.0719268	0.138178	0.0415411	0.109964	0.19407	0.121842	0.184283	0.105009	0.0401811	0.0563157	0.0233838	0.0381956	0.0283232	Amorphea	Blastocladiomycota	Blastocladiomycetes	Blastocladiales	Blastocladiaceae	Blastocladiella
DQ244015.1.1871_2	0.0874174	0.163391	0.172853	0.135083	0.136851	0.243636	0.0382126	0.0906622	0.296332	0.0461911	0.139668	0.245259	0.149021	0.145275	0.0703316	0.0972512	0.110797	0.0948859	0.0562077	0.0926644	0.140201	0.138276	0.0896654	0.367671	0.0628559	0.214925	0.190573	0.162417	0.470735	0.235013	0.0802246	0.0630888	0.142511	0.258005	0.171535	Amorphea	Blastocladiomycota	Blastocladiomycetes	Blastocladiales
KT362375.1.1703	0.0297373	0.0328696	0.0432417	0.0275676	0.0172394	0.017795	0.0271423	0.034012	0.0143588	0.024839	0.021282	0.023527	0.0384293	0.0318611	0.0272325	0.0247691	0.0206498	0.0592821	0.0389627	0.0230347	0.0177709	0.0316387	0.0285833	0.0221779	0.0296243	0.0244926	0.0542464	0.0309269	0.0215966	0.0234847	0.0323848	0.0271332	0.0311397	0.0353779	0.0331814	Amorphea	Chytridiomycota	Chytridiomycetes	Chytridiales	Chytridiaceae
DQ536486.1.1733	0.0396062	0.00712868	0.0625896	0.0213504	0.174104	0.00444875	0.0164557	0.172758	0.0170066	0.0873402	0.0443145	0.00637272	0.193526	0.0567859	0.0898596	0.0828677	0.00643446	0.150498	0.170041	0.124054	0.01984	0.0654238	0.0649179	0.097638	0.113809	0.00421803	0.156169	0.0480117	0.0769542	0.00926158	0.153774	0.109701	0.0113579	0.0238651	0.0188774	Amorphea	Chytridiomycota	Chytridiomycetes	Chytridiales	Chytriomycetaceae	Chytriomyces
GQ995412.1.1770	0.0579575	0.0546856	0.0743989	0.0709326	0.0560662	0.0496815	0.0731647	0.0765973	0.052991	0.179537	0.0484879	0.0493691	0.0720534	0.0658695	0.141689	0.0728184	0.0417787	0.0827131	0.0710434	0.149572	0.0388683	0.060239	0.0768144	0.0944056	0.0698444	0.0454973	0.065785	0.0693966	0.123112	0.0512901	0.0755743	0.073192	0.0328536	0.0446991	0.0428267	Amorphea	Chytridiomycota	Chytridiomycetes	Gromochytriales	Gromochytriaceae
EU371354.1.1766	0.071725	0.0342704	0.0383723	0.0342794	0.0430218	0.0298197	0.0198389	0.0373879	0.0307997	0.0175276	0.102267	0.0646116	0.0730096	0.0184304	0.0257916	0.0380841	0.027395	0.031711	0.0195966	0.0296497	0.0444948	0.0330078	0.0167134	0.0496009	0.0473661	0.0386226	0.0280554	0.0303405	0.0530682	0.0496776	0.0400533	0.0174194	0.113913	0.197012	0.138111	Amorphea	Chytridiomycota	Chytridiomycetes	Lobulomycetales	Lobulomycetaceae
GQ995410.1.1790	0.086765	0.0342842	0.0119549	0.0449334	0.0506289	0.0209606	0.0147603	0.0130721	0.0495501	0.00960081	0.063945	0.0443099	0.0223798	0.0207145	0.0111117	0.0197504	0.0218927	0.00981237	0.0217638	0.0144443	0.0637857	0.00522013	0.0176326	0.0446027	0.050193	0.0472839	0.0101076	0.0402378	0.0400702	0.0175619	0.00666572	0.0220406	0.0275523	0.0164508	0.0479556	Amorphea	Chytridiomycota	Chytridiomycetes	Lobulomycetales	Lobulomycetaceae
AB971109.1.1788	0.0357402	0.024784	0.0741239	0.0660012	0.038044	0.0296737	0.0177215	0.0705782	0.0303564	0.362125	0.0382424	0.0320457	0.0794246	0.0613856	0.263976	0.0461523	0.0308647	0.0956768	0.100369	0.296678	0.0307906	0.0669961	0.0494066	0.153479	0.0361474	0.0114811	0.0794297	0.0742298	0.20417	0.0471141	0.0991107	0.0787047	0.0343205	0.0864523	0.25572	Amorphea	Chytridiomycota	Chytridiomycetes	Rhizophydiales	Rhizophydiaceae	Rhizophydium
GQ995427.1.1772	0.00856394	0.0115529	0.00892981	0.00979209	0.0119808	0.00432581	0.0360261	0.00698455	0.00952976	0.0394619	0.0110564	0.00483807	0.00596713	0.00523125	0.0121881	0.00447836	0.00511391	0.00573418	0.00832279	0.0175796	0.00685208	0.00544095	0.00430429	0.012997	0.00733079	0.00412482	0.00804173	0.00697431	0.0168594	0.00648104	0.00810111	0.00873017	0.00936806	0.0119397	0.0196609	Amorphea	Chytridiomycota	Chytridiomycetes	Rhizophydiales	Rhizophydiaceae
GQ995433.1.1771	0.0575497	0.056974	0.0759519	0.0570993	0.033764	0.0233809	0.0427542	0.0481112	0.0273179	0.0746825	0.045699	0.0405643	0.0672845	0.052323	0.0742219	0.0523716	0.0347746	0.0636198	0.0619944	0.0754473	0.0252437	0.0530669	0.0418232	0.053417	0.0404665	0.0387702	0.0514953	0.0528004	0.0638718	0.0291595	0.0535224	0.0389784	0.0714587	0.10296	0.119889	Amorphea	Chytridiomycota	Chytridiomycetes	Rhizophydiales	Rhizophydiaceae
GQ995433.1.1771_2	0.0412211	0.029971	0.0789771	0.0663121	0.0444343	0.0287824	0.0290603	0.0625049	0.0290733	0.343955	0.0367096	0.0293535	0.0709641	0.0544176	0.221598	0.039909	0.028612	0.0821941	0.0867553	0.255267	0.0288886	0.0600712	0.0441742	0.142922	0.0330536	0.014534	0.0711058	0.0642792	0.179366	0.0428555	0.0864479	0.0707943	0.0392006	0.084275	0.236458	Amorphea	Chytridiomycota	Chytridiomycetes	Rhizophydiales	Rhizophydiaceae
HQ191313.1.2259	0.0133761	0.0139522	0.0421901	0.0134094	0.00793045	0.00977342	0.0121212	0.0195841	0.00852079	0.0159264	0.0110267	0.0109897	0.0225855	0.0121255	0.0165192	0.0118743	0.00919208	0.0565509	0.0142479	0.0152961	0.0117305	0.0328577	0.0112955	0.0123909	0.0137307	0.011217	0.056665	0.0114699	0.0145911	0.0113599	0.0242247	0.0101647	0.017182	0.0197809	0.0163556	Amorphea	Chytridiomycota	Chytridiomycetes	Rhizophydiales	Rhizophydiaceae
KM870671.1.1737	0.0199499	0.013342	0.0390194	0.0168288	0.0452427	0.00923557	0.0268815	0.048481	0.0120551	0.0297949	0.0290848	0.011601	0.060216	0.026272	0.0333605	0.0346743	0.00912735	0.0473317	0.0544209	0.0450726	0.0129083	0.0277347	0.0234571	0.0311942	0.0415754	0.0100907	0.0615827	0.027151	0.0345313	0.0131998	0.0509269	0.0391628	0.0219895	0.0334852	0.0237498	Amorphea	Chytridiomycota	Chytridiomycetes	Rhizophydiales
KM870671.1.1737_2	0.0137676	0.0110952	0.0355575	0.0182418	0.0136485	0.00779108	0.0126429	0.0167903	0.00902236	0.0482621	0.0165549	0.0108466	0.0228397	0.0167147	0.0383611	0.0174812	0.00748313	0.0261993	0.0252105	0.0393275	0.00919182	0.0224616	0.0128422	0.0248192	0.0145863	0.0076748	0.0284282	0.0177689	0.0313451	0.00919956	0.0247359	0.017696	0.0173418	0.0314217	0.0372846	Amorphea	Chytridiomycota	Chytridiomycetes	Rhizophydiales

## Sheet: TableS8 - % taxa locations
SE_SW	number of taxa	%
Rhizophydiales	4	22.2222
Lobulomycetales	2	11.1111
Blastocladiomycota	4	22.2222
Monoblepharidomycota	1	5.55556
Mesochytriales	4	22.2222
Chytridiales	1	5.55556
Incerta sedis	2	11.2
	18	100
SW
Rhizophydiales	11	45.8333
Lobulomycetales	4	16.6667
Blastocladiomycota	0	0
Monoblepharidomycota	1	4.16667
Mesochytriales	7	29.1667
Chytridiales	1	4.16667
Incertae sedis	0	0
	24	100
CW
Rhizophydiales	12	34.2857
Lobulomycetales	5	14.2857
Blastocladiomycota	2	5.71429
Monoblepharidomycota	0	0
Mesochytriales	12	34.2857
Chytridiales	3	8.57143
Incertae sedis	1	2.85714
	35	100
NW
Rhizophydiales	8	30.7692
Lobulomycetales	6	23.0769
Blastocladiomycota	2	7.69231
Monoblepharidomycota	0	0
Mesochytriales	4	15.3846
Chytridiales	3	11.5385
Incertae sedis	3	11.5
	26	100
Total sequences
Rhizophydiales	35	35.3535
Lobulomycetales	17	17.1717
Blastocladiomycota	8	8.08081
Monoblepharidomycota	2	2.0202
Mesochytriales	27	27.2727
Chytridiales	8	8.08081
Incertae sedis	6	6.06061

## Sheet: Table S9 - SM Mesochytriale
	SW_A taxon2	NW taxon5	AJ867630_Uncultured_WS_10_E14_melted_white_snow_water_switzerland	CW taxon19	CW taxon17	CW taxon16	CW taxon18	NW taxon4	SW_A taxon5	SW_A taxon6	CW taxon24	SE-SW taxon5	GQ995412_Uncultured_Chytridiomycota_T2P1AeF04_high_elevation_soil	CW taxon7	CW taxon25	SE-SW taxon6	SW_A taxon7	SE-SW taxon7	SW_B taxon5	CW taxon23	SW_A taxon8	SW_B taxon6	SE-SW taxon8	CW taxon28	GQ995413_Uncultured_Chytridiomycota_T3P1AeC03_high_elevation_soil	CW taxon26	NW taxon14	CW taxon27	CW taxon29	GQ995415_Uncultured_T2P1AeB05_Chytridiomycetes_Mesochytriales	NW taxon13	EU162641_Uncultured_PFF5SP2005_Chytridiomycetes_Mesochytriales	FJ804149_Mesochytrium_penetrans_CALU_X_10_Chytridiomycetes_Mesochytriales
SW_A taxon2		95.9	97.3	95.6	96	94.9	94.3	93.9	93	94.3	93.8	93.3	93.4	91.9	92.9	93	92.6	93.8	91.6	92.4	93.7	94.3	94.7	94.1	93.8	92.4	92.1	91.4	92.9	94.2	90.1	91.5	86.7
NW taxon5	95.9		97.6	96.6	96.2	95.8	94.8	94.4	94.1	96.3	95.3	94.6	95.4	94.1	94.1	95.1	94	95.1	93.8	94.3	94.9	95	95.3	95.4	95	93.5	93	92.6	94.3	94.9	91.4	93.1	87.7
AJ867630_Uncultured_WS_10_E14_melted_white_snow_water_switzerland	97.3	97.6		97.7	97.1	97	96.4	95.7	93.9	96	95.3	94.1	95	93.4	93.8	94.2	93.2	94.9	93	94.1	95.1	95.7	95.9	95.7	95.4	94	93.5	93	94.1	95.4	91.8	93.4	88.5
CW taxon19	95.6	96.6	97.7		95.6	96.1	95.1	94.3	92.6	94.4	93.7	92.7	93.7	92.5	92.3	92.9	92	93.5	91.9	92.4	93.9	93.8	94.1	94.2	93.9	92.6	92.2	91.9	92.9	93.8	90.7	92	86.7
CW taxon17	96	96.2	97.1	95.6		94.7	94.2	93.5	93.8	94.6	93.8	93.9	94.5	92.8	93.5	94.1	93.1	93.4	92.7	93.1	95	95.3	95.9	94.3	94.7	93	92.7	92.1	94	94.3	91	92.6	87.7
CW taxon16	94.9	95.8	97	96.1	94.7		96.4	94.6	91.7	93.7	92.9	92.5	92.7	92.8	92.9	92.1	91.2	92.9	91.7	91.7	93.3	93	93.3	93.7	93.4	92.1	92.5	93.3	92.8	93.3	91.5	91.8	86.6
CW taxon18	94.3	94.8	96.4	95.1	94.2	96.4		93.9	91	93.2	92.7	92	92.2	91.9	92.6	91.4	90.7	91.9	91.1	91.3	92.5	92.7	93.3	93.1	92.7	91.4	92	92.7	91.6	92.7	90.9	91	86.9
NW taxon4	93.9	94.4	95.7	94.3	93.5	94.6	93.9		90.8	92.7	93.3	91.7	91.5	91.8	91.5	91.3	91.1	91.7	90.7	91.5	91.8	92.5	92.4	92.8	92.3	91.2	92.4	91.3	90.4	92.1	90.4	90.3	85.6
SW_A taxon5	93	94.1	93.9	92.6	93.8	91.7	91	90.8		96.4	94.5	96.8	96.9	95.2	95.4	95.9	95.8	95.3	95.3	95.3	94.6	94.9	94.9	95.3	95	93	92.9	92.4	93.8	94.6	91.4	93.2	86.1
SW_A taxon6	94.3	96.3	96	94.4	94.6	93.7	93.2	92.7	96.4		97.4	97	97.4	95.6	96.4	97.1	96	96.6	95.9	96.6	96.4	97	97.1	97.1	96.4	95	94.6	94.1	94.9	96.2	93.1	94.3	88.2
CW taxon24	93.8	95.3	95.3	93.7	93.8	92.9	92.7	93.3	94.5	97.4		95.7	96	95	95.5	96.2	95.1	96.8	94.3	95.9	96.1	97.1	96.8	97.4	96.9	95.1	95.3	94.5	94.3	96.4	94.1	94.2	87.2
SE-SW taxon5	93.3	94.6	94.1	92.7	93.9	92.5	92	91.7	96.8	97	95.7		97.4	96	97.3	95.8	96.1	96.1	95.5	95.6	95	95.3	95.1	95.4	95.1	93.2	94	93.2	94.2	95	92.1	92.9	86
GQ995412_Uncultured_Chytridiomycota_T2P1AeF04_high_elevation_soil	93.4	95.4	95	93.7	94.5	92.7	92.2	91.5	96.9	97.4	96	97.4		97	97.2	96.1	95.6	95.6	96	96.5	95.5	95.8	95.7	96	95.3	93.8	93.5	93	94.4	95.1	92	93.8	87.1
CW taxon7	91.9	94.1	93.4	92.5	92.8	92.8	91.9	91.8	95.2	95.6	95	96	97		96	95	95.5	94.8	95.9	95.5	94.6	94.3	94	94.6	93.7	92.3	93.2	92.9	93.8	93.6	92.1	92.2	85.3
CW taxon25	92.9	94.1	93.8	92.3	93.5	92.9	92.6	91.5	95.4	96.4	95.5	97.3	97.2	96		94.8	94.9	95.1	94.7	95.6	94.4	94.9	95.1	95	94.4	93	93.7	93.6	93.9	94.2	92	92.5	85.5
SE-SW taxon6	93	95.1	94.2	92.9	94.1	92.1	91.4	91.3	95.9	97.1	96.2	95.8	96.1	95	94.8		96.8	95.8	95.5	94.5	95.8	95.4	95.5	95.9	95.7	93.7	94.3	93	94.4	95.4	92.3	93.3	87.1
SW_A taxon7	92.6	94	93.2	92	93.1	91.2	90.7	91.1	95.8	96	95.1	96.1	95.6	95.5	94.9	96.8		95.9	95.5	94.8	94.2	94.6	94.4	94.4	94.2	92.2	93.1	91.6	93.8	93.8	91.5	92.3	85.5
SE-SW taxon7	93.8	95.1	94.9	93.5	93.4	92.9	91.9	91.7	95.3	96.6	96.8	96.1	95.6	94.8	95.1	95.8	95.9		94.5	95	95.3	96	96.2	96.2	95.9	94.2	94.1	93.6	95	96.2	92.5	93.3	86.3
SW_B taxon5	91.6	93.8	93	91.9	92.7	91.7	91.1	90.7	95.3	95.9	94.3	95.5	96	95.9	94.7	95.5	95.5	94.5		94.6	93.7	93.7	93.7	94	93.4	92	91.7	91.7	93.5	93.3	91.2	92.3	86.8
CW taxon23	92.4	94.3	94.1	92.4	93.1	91.7	91.3	91.5	95.3	96.6	95.9	95.6	96.5	95.5	95.6	94.5	94.8	95	94.6		94.6	95.3	95	95	94.4	92.9	92.9	92.1	93.7	94.4	91.7	92.5	85.9
SW_A taxon8	93.7	94.9	95.1	93.9	95	93.3	92.5	91.8	94.6	96.4	96.1	95	95.5	94.6	94.4	95.8	94.2	95.3	93.7	94.6		97.4	98	97.1	96.9	95.5	95	94.8	95.3	96.2	93.4	93.8	88
SW_B taxon6	94.3	95	95.7	93.8	95.3	93	92.7	92.5	94.9	97	97.1	95.3	95.8	94.3	94.9	95.4	94.6	96	93.7	95.3	97.4		98.4	97.5	97.2	95.6	95.4	94.9	95.3	96.7	93.8	94.6	87.6
SE-SW taxon8	94.7	95.3	95.9	94.1	95.9	93.3	93.3	92.4	94.9	97.1	96.8	95.1	95.7	94	95.1	95.5	94.4	96.2	93.7	95	98	98.4		97.5	97.2	95.8	95.1	95	95.7	96.7	93.5	94.4	88.1
CW taxon28	94.1	95.4	95.7	94.2	94.3	93.7	93.1	92.8	95.3	97.1	97.4	95.4	96	94.6	95	95.9	94.4	96.2	94	95	97.1	97.5	97.5		98.5	97.3	96	96.2	95.3	97.1	95.1	94.9	88.7
GQ995413_Uncultured_Chytridiomycota_T3P1AeC03_high_elevation_soil	93.8	95	95.4	93.9	94.7	93.4	92.7	92.3	95	96.4	96.9	95.1	95.3	93.7	94.4	95.7	94.2	95.9	93.4	94.4	96.9	97.2	97.2	98.5		96.7	96.7	96.9	95.7	97.3	95	95.1	88.5
CW taxon26	92.4	93.5	94	92.6	93	92.1	91.4	91.2	93	95	95.1	93.2	93.8	92.3	93	93.7	92.2	94.2	92	92.9	95.5	95.6	95.8	97.3	96.7		94.2	94.2	94.2	94.9	93.4	92.9	87.6
NW taxon14	92.1	93	93.5	92.2	92.7	92.5	92	92.4	92.9	94.6	95.3	94	93.5	93.2	93.7	94.3	93.1	94.1	91.7	92.9	95	95.4	95.1	96	96.7	94.2		95.1	93.6	95.5	93.6	92.8	87
CW taxon27	91.4	92.6	93	91.9	92.1	93.3	92.7	91.3	92.4	94.1	94.5	93.2	93	92.9	93.6	93	91.6	93.6	91.7	92.1	94.8	94.9	95	96.2	96.9	94.2	95.1		93.5	94.7	94	92.5	86.1
CW taxon29	92.9	94.3	94.1	92.9	94	92.8	91.6	90.4	93.8	94.9	94.3	94.2	94.4	93.8	93.9	94.4	93.8	95	93.5	93.7	95.3	95.3	95.7	95.3	95.7	94.2	93.6	93.5		94.9	92.7	92.8	87.2
GQ995415_Uncultured_T2P1AeB05_Chytridiomycetes_Mesochytriales	94.2	94.9	95.4	93.8	94.3	93.3	92.7	92.1	94.6	96.2	96.4	95	95.1	93.6	94.2	95.4	93.8	96.2	93.3	94.4	96.2	96.7	96.7	97.1	97.3	94.9	95.5	94.7	94.9		93.5	94.4	87.7
NW taxon13	90.1	91.4	91.8	90.7	91	91.5	90.9	90.4	91.4	93.1	94.1	92.1	92	92.1	92	92.3	91.5	92.5	91.2	91.7	93.4	93.8	93.5	95.1	95	93.4	93.6	94	92.7	93.5		91.6	84.8
EU162641_Uncultured_PFF5SP2005_Chytridiomycetes_Mesochytriales	91.5	93.1	93.4	92	92.6	91.8	91	90.3	93.2	94.3	94.2	92.9	93.8	92.2	92.5	93.3	92.3	93.3	92.3	92.5	93.8	94.6	94.4	94.9	95.1	92.9	92.8	92.5	92.8	94.4	91.6		88.7
FJ804149_Mesochytrium_penetrans_CALU_X_10_Chytridiomycetes_Mesochytriales	86.7	87.7	88.5	86.7	87.7	86.6	86.9	85.6	86.1	88.2	87.2	86	87.1	85.3	85.5	87.1	85.5	86.3	86.8	85.9	88	87.6	88.1	88.7	88.5	87.6	87	86.1	87.2	87.7	84.8	88.7

[truncated: 6 more sheets: Table S10 - SM Monoblepharid, Table S11 - SM Chytridiales, Table S12 - SM Blastocladiom, Table S13 - SM Lobulomycelat, Table S14 - SM Rhizophydiale, Table S15 - qPCR]
